# Supplementary material for: Breakthrough infections by SARS-CoV-2 variants boost cross-reactive hybrid immune responses in mRNA-vaccinated Golden Syrian Hamsters
Source: PubMed Central journal article supplement — bioRxiv. 2023 May 23:2023.05.22.541294. Preprint. [Version 2] doi: 10.1101/2023.05.22.541294 (PMC10327228; doi:10.1101/2023.05.22.541294), 2023-05-23
Supplement: media-1.pdf [file media-1.pdf]

## SUPPLEMENTARY TABLE

**Supplementary Table 1. Genes upregulated by vaccination but not by infection in vaccine-matching WA1/2020 infected animals.**

| Ensembl Code       | Gene            | Base mean <sup>a</sup> | log <sub>2</sub> (Fold Change) <sup>b</sup> | lfcSE <sup>c</sup> | Stat <sup>d</sup> | p-value | p-adj <sup>e</sup> |
|--------------------|-----------------|------------------------|---------------------------------------------|--------------------|-------------------|---------|--------------------|
| ENSMAUG0000007886  | <i>Vsig1</i>    | 23.82840               | 2.82632                                     | 0.86353            | 3.27297           | 0.00106 | 0.02395            |
| ENSMAUG00000020451 | <i>Zfp683</i>   | 12.77957               | 2.66024                                     | 0.47628            | 5.58548           | 0.00000 | 0.00000            |
| ENSMAUG00000005020 | <i>Hrob</i>     | 8.07341                | 2.60012                                     | 0.71668            | 3.62798           | 0.00029 | 0.00896            |
| ENSMAUG00000014751 | <i>Itnl1</i>    | 72.86937               | 2.23639                                     | 0.63190            | 3.53918           | 0.00040 | 0.01157            |
| ENSMAUG00000001649 | <i>Cyp26b1</i>  | 26.26286               | 2.05161                                     | 0.62028            | 3.30753           | 0.00094 | 0.02209            |
| ENSMAUG00000001547 | <i>Spns3</i>    | 12.61973               | 1.97350                                     | 0.45548            | 4.33284           | 0.00001 | 0.00079            |
| ENSMAUG00000000757 | <i>Dbp</i>      | 28.13340               | 1.72906                                     | 0.49749            | 3.47559           | 0.00051 | 0.01379            |
| ENSMAUG00000015676 | <i>Kcng1</i>    | 8.66631                | 1.71226                                     | 0.48195            | 3.55276           | 0.00038 | 0.01112            |
| ENSMAUG00000015196 | <i>Sh2d1a</i>   | 10.36465               | 1.67394                                     | 0.54749            | 3.05750           | 0.00223 | 0.04050            |
| ENSMAUG00000015783 | <i>Zc3h12d</i>  | 19.91885               | 1.57167                                     | 0.47552            | 3.30513           | 0.00095 | 0.02224            |
| ENSMAUG00000017156 | <i>Marchf10</i> | 7.06600                | 1.55809                                     | 0.50802            | 3.06698           | 0.00216 | 0.03966            |
| ENSMAUG00000018293 | <i>Arhgef39</i> | 10.35627               | 1.53928                                     | 0.51236            | 3.00431           | 0.00266 | 0.04591            |
| ENSMAUG00000015031 | <i>Klrg1</i>    | 9.36680                | 1.39950                                     | 0.40779            | 3.43188           | 0.00060 | 0.01552            |
| ENSMAUG00000019266 | <i>Hao</i>      | 14.74745               | 1.39186                                     | 0.39352            | 3.53694           | 0.00040 | 0.01160            |
| ENSMAUG00000021348 | <i>Coll1a2</i>  | 17.03576               | 1.37335                                     | 0.36844            | 3.72742           | 0.00019 | 0.00651            |
| ENSMAUG00000019140 | <i>Icosl</i>    | 18.74959               | 1.34756                                     | 0.38403            | 3.50895           | 0.00045 | 0.01250            |
| ENSMAUG00000018778 | <i>Lime1</i>    | 11.40338               | 1.28389                                     | 0.42094            | 3.05003           | 0.00229 | 0.04121            |
| ENSMAUG00000017163 | <i>Fchol</i>    | 23.10064               | 1.08662                                     | 0.29468            | 3.68740           | 0.00023 | 0.00745            |
| ENSMAUG00000000752 | <i>Ddx11</i>    | 19.85041               | 1.03004                                     | 0.33604            | 3.06521           | 0.00218 | 0.03984            |
| ENSMAUG00000022124 | <i>Wdr76</i>    | 372.80547              | 1.00393                                     | 0.29214            | 3.43648           | 0.00059 | 0.01532            |
| ENSMAUG00000014187 | <i>Sult1c2</i>  | 21.36362               | 0.99204                                     | 0.29838            | 3.32474           | 0.00089 | 0.02107            |
| ENSMAUG00000020400 | <i>Ctcl</i>     | 25.34021               | 0.92440                                     | 0.27417            | 3.37159           | 0.00075 | 0.01846            |
| ENSMAUG00000015203 | <i>Nt5c</i>     | 55.46074               | 0.89023                                     | 0.24775            | 3.59328           | 0.00033 | 0.00988            |
| ENSMAUG00000014228 | <i>Lrrc18</i>   | 22.63506               | 0.88098                                     | 0.29365            | 3.00007           | 0.00270 | 0.04612            |
| ENSMAUG00000007672 | <i>Ltb</i>      | 61.80016               | 0.87800                                     | 0.26600            | 3.30068           | 0.00096 | 0.02230            |
| ENSMAUG00000018364 | <i>Ifrd2</i>    | 92.22219               | 0.87744                                     | 0.22490            | 3.90147           | 0.00010 | 0.00367            |
| ENSMAUG00000016464 | <i>Rfc3</i>     | 42.17511               | 0.86357                                     | 0.25933            | 3.33001           | 0.00087 | 0.02085            |
| ENSMAUG00000010583 | <i>Cdca7l</i>   | 71.94039               | 0.86094                                     | 0.26738            | 3.21986           | 0.00128 | 0.02696            |

|                           |               |            |         |         |         |         |         |
|---------------------------|---------------|------------|---------|---------|---------|---------|---------|
| <b>ENSMAUG00000016884</b> | <i>Themis</i> | 36.94183   | 0.79483 | 0.25709 | 3.09161 | 0.00199 | 0.03717 |
| <b>ENSMAUG00000003857</b> | <i>Slirp</i>  | 39.71779   | 0.78927 | 0.25485 | 3.09698 | 0.00196 | 0.03678 |
| <b>ENSMAUG00000020536</b> | <i>Nup85</i>  | 62.99557   | 0.75629 | 0.19462 | 3.88605 | 0.00010 | 0.00386 |
| <b>ENSMAUG00000019979</b> | <i>Lmnb2</i>  | 135.68315  | 0.74401 | 0.20230 | 3.67773 | 0.00024 | 0.00766 |
| <b>ENSMAUG00000020606</b> | <i>Srgap3</i> | 53.32324   | 0.72252 | 0.20753 | 3.48148 | 0.00050 | 0.01359 |
| <b>ENSMAUG00000018732</b> | <i>Tssc4</i>  | 50.93902   | 0.64719 | 0.20294 | 3.18913 | 0.00143 | 0.02885 |
| <b>ENSMAUG00000012212</b> | <i>Cd37</i>   | 114.90059  | 0.63391 | 0.20603 | 3.07673 | 0.00209 | 0.03877 |
| <b>ENSMAUG00000003325</b> | <i>Paxip1</i> | 93.22434   | 0.61247 | 0.14099 | 4.34399 | 0.00001 | 0.00076 |
| <b>ENSMAUG00000020021</b> | <i>Pfas</i>   | 171.59328  | 0.60483 | 0.18879 | 3.20379 | 0.00136 | 0.02777 |
| <b>ENSMAUG00000012577</b> | <i>Ligl</i>   | 186.52698  | 0.59510 | 0.16959 | 3.50904 | 0.00045 | 0.01250 |
| <b>ENSMAUG00000000104</b> | <i>Gpr183</i> | 109.25363  | 0.53348 | 0.17415 | 3.06331 | 0.00219 | 0.03997 |
| <b>ENSMAUG00000019805</b> | <i>Tarbp2</i> | 92.34949   | 0.48403 | 0.15314 | 3.16062 | 0.00157 | 0.03111 |
| <b>ENSMAUG00000009284</b> | <i>Stxbp2</i> | 160.02297  | 0.42772 | 0.13681 | 3.12635 | 0.00177 | 0.03426 |
| <b>ENSMAUG00000007062</b> | <i>Eef2</i>   | 4806.03639 | 0.40648 | 0.12531 | 3.24379 | 0.00118 | 0.02536 |
| <b>ENSMAUG00000014174</b> | <i>Gpil</i>   | 418.74015  | 0.40584 | 0.11303 | 3.59054 | 0.00033 | 0.00994 |
| <b>ENSMAUG00000018966</b> | <i>Khsrp</i>  | 306.17420  | 0.36374 | 0.11214 | 3.24356 | 0.00118 | 0.02536 |
| <b>ENSMAUG00000009823</b> | <i>Esys1</i>  | 472.96805  | 0.35912 | 0.10721 | 3.34982 | 0.00081 | 0.01968 |
| <b>ENSMAUG00000022241</b> | <i>Tp53</i>   | 183.25934  | 0.34594 | 0.10841 | 3.19113 | 0.00142 | 0.02875 |

<sup>a</sup>Base: Mean average of the normalized count values, dividing by size factors, taken over all samples.

<sup>b</sup>log<sub>2</sub> (Fold Change): Effect size estimate.

<sup>c</sup>lfcSE: standard error estimate log<sub>2</sub> (Fold Change).

<sup>d</sup>stat: value of the test statistic for the transcript.

<sup>e</sup>p-adj: Adjusted p-value for multiple testing for the transcript.
