# Supplementary material for: Breakthrough infections by SARS-CoV-2 variants boost cross-reactive hybrid immune responses in mRNA-vaccinated Golden Syrian Hamsters
Source: PubMed Central journal article supplement — bioRxiv. 2023 May 23:2023.05.22.541294. Preprint. [Version 2] doi: 10.1101/2023.05.22.541294 (PMC10327228; doi:10.1101/2023.05.22.541294), 2023-05-23
Supplement: media-2.pdf [file media-2.pdf]

## **SUPPLEMENTARY FIGURES**

**Supplementary Figure 1.** INF- $\gamma$  producing cells per million splenocytes after stimulation with (from left to right): N-peptide, S-peptide, HA-peptide and un-stimulated.

**Supplementary Figure 2. Gene ontology.** Top 25 most significantly upregulated biological processes based on significance in WA1/2020 challenged groups. (A) Upregulated biological processes in vaccinated animals compared to unvaccinated (B) Upregulated biological processes in unvaccinated animals compared to vaccinated.

**Supplementary Figure 3. Abundance of additional cell subsets in the lungs of infected hamsters extrapolated from the host transcriptome.** Scale represents estimated fraction of each cell type for each condition.

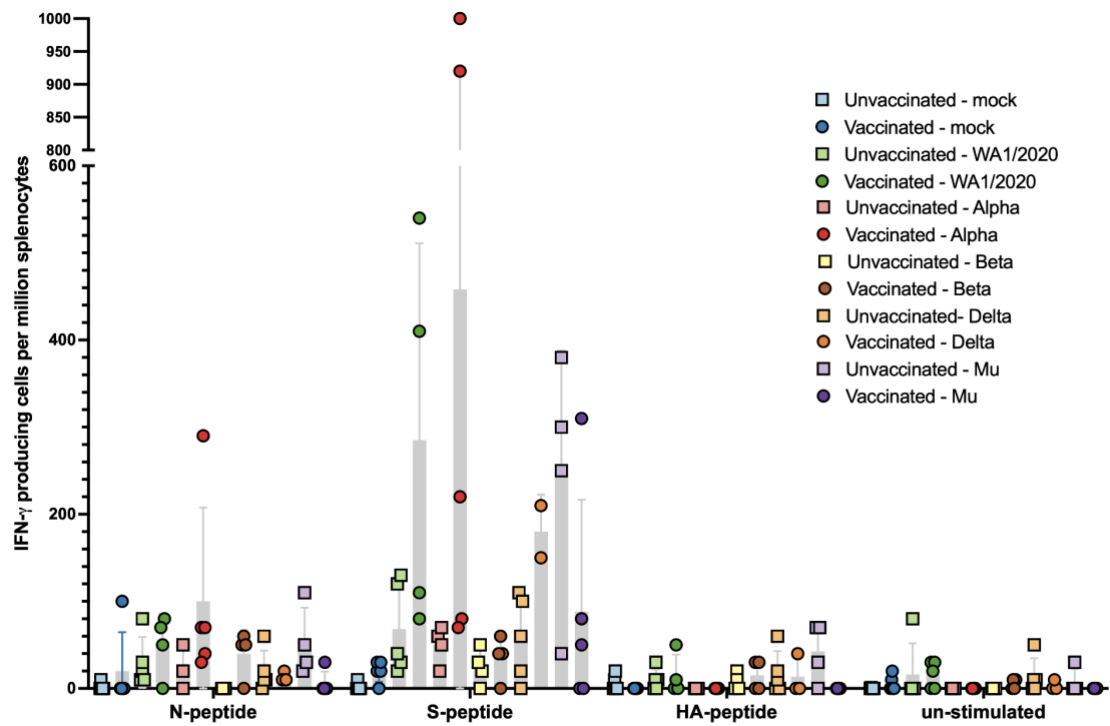

**Supplementary Figure 1.** IFN- $\gamma$  producing cells per million splenocytes after stimulation with (from left to right): N-peptide, S-peptide, HA-peptide and un-stimulated.

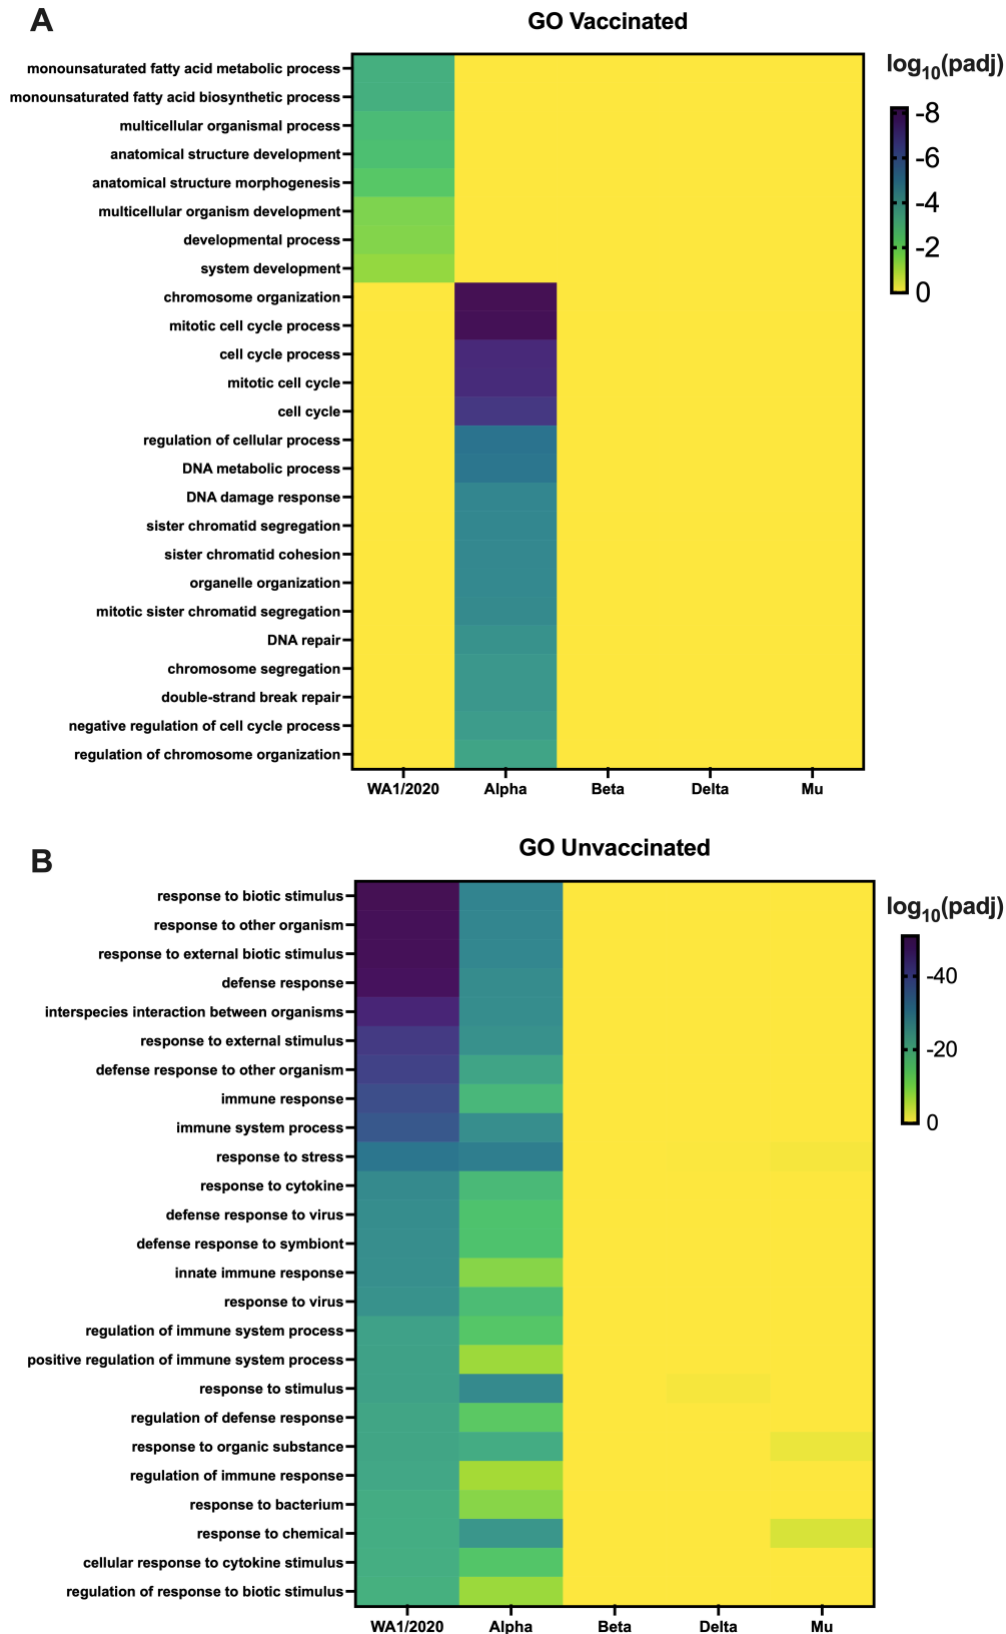

**Supplementary Figure 2. Gene ontology.** Top 25 most significantly upregulated biological processes based on significance in WA1/2020 challenged groups. (A) Upregulated biological processes in vaccinated animals compared to unvaccinated (B) Upregulated biological processes in unvaccinated animals compared to vaccinated.

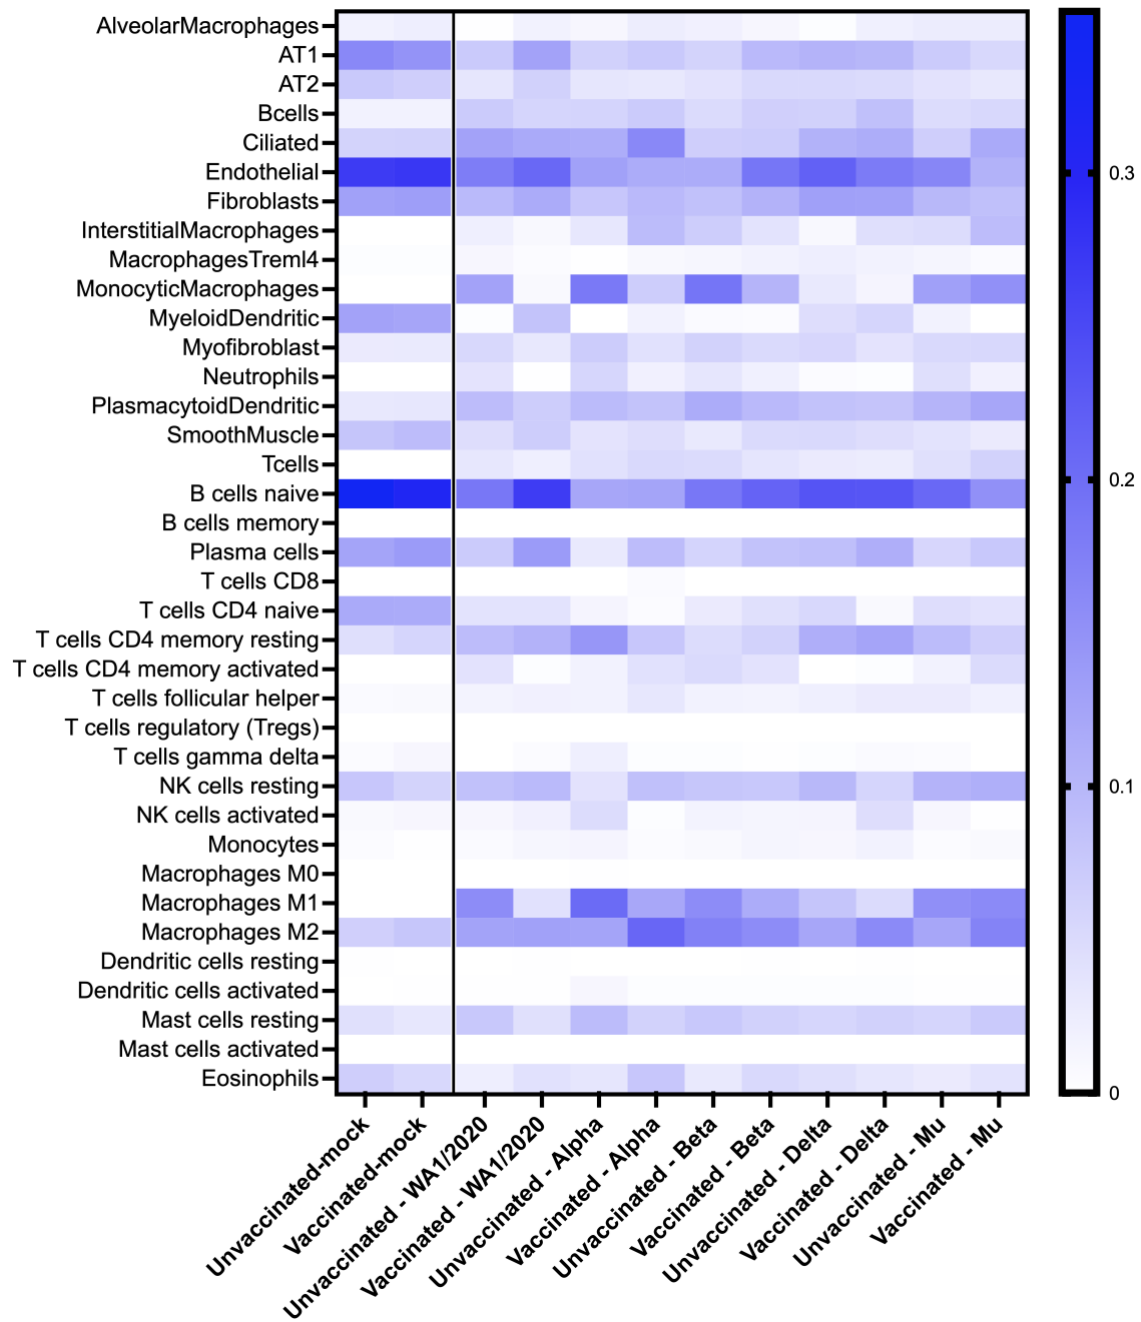

**Supplementary Figure 3. Abundance of additional cell subsets in the lungs of infected hamsters extrapolated from the host transcriptome.** Scale represents estimated fraction of each cell type for each condition.
